# Supplementary material for: Hydrophobic study of increasing alkyl chain length of platinum surfactant complexes: synthesis, characterization, micellization, thermodynamics, thermogravimetrics and surface morphology
Source: Royal Society of Chemistry journal article supplement (doi:10.1039/c6ra20330b), 2016-01-01
Supplement: c6ra20330b1.pdf [file c6ra20330b1.pdf]

**Electronic Supplementary Information (ESI)**

**Hydrophobic study of increasing alkyl chain length of platinum surfactant complexes:  
Synthesis, characterization, micellization, thermodynamic, thermogravimetric and  
surface morphology**

<sup>a</sup>Nitin Kumar Sharma, <sup>a\*</sup>Man Singh and <sup>b</sup>Ajaya Bhattarai

<sup>a</sup>School of Chemical Sciences, Central University of Gujarat, Gandhinagar, 382030, India

<sup>b</sup>Department of Chemistry, M.M.A.M.C., Tribhuvan University, Biratnagar, Nepal

## Table of contents for ESI

**Figure S1.** Increasing alkyl chain effect on % Yield and reaction time of SMMSs.

**Figure S2.**  $^1\text{H}$  proton NMR of OTAB in DMSO-d<sub>6</sub>.

**Figure S3.**  $^1\text{H}$  proton NMR of MOTA in D<sub>2</sub>O.

**Figure S4.**  $^1\text{H}$  proton NMR of DTAB in DMSO-d<sub>6</sub>.

**Figure S5.**  $^1\text{H}$  proton NMR of MDTA in DMSO-d<sub>6</sub>.

**Figure S6.**  $^1\text{H}$  proton NMR of DDTAB in DMSO-d<sub>6</sub>.

**Figure S7.**  $^1\text{H}$  proton NMR of MDDTA in DMSO-d<sub>6</sub>.

**Figure S8.**  $^1\text{H}$  proton NMR of TDTAB in DMSO-d<sub>6</sub>.

**Figure S9.**  $^1\text{H}$  proton NMR of MTDTA in DMSO-d<sub>6</sub>.

**Figure S10.**  $^1\text{H}$  proton NMR of HDTAB in DMSO-d<sub>6</sub>.

**Figure S11.**  $^1\text{H}$  proton NMR of MHDTA in DMSO-d<sub>6</sub>.

**Figure S12.** Variation of CMC of SMMSs in 0.2 volume fraction of DMSO in DMSO- water mixed solvent media at 308.15 K.

**Figure S13.** Variation of CMC of SMMSs in 0.2 volume fraction of DMSO in DMSO- water mixed solvent media at 318.15 K.

**Figure S14.** Linearization curves of SMMSs obtained by Coats–Redfern (CR) method.

**Figure S15.** Linearization curves of SMMSs obtained by Madhusudanan–Krishnan–Ninan (MKN) method.

**Figure S16.** Linearization curves of SMMSs obtained by Wanjun–Yuwen–Hen–Cunxin (WYHC) method.

**Figure S17.** Linearization curves of SMMSs obtained by Van Krevelen (VK) method.

**Figure S18.** Linearization curves of SMMSs obtained by Horowitz–Metzger (HM) method.

**Table S1.** Details of chemicals used in this work.

**Table S2.** DLS data of MDTA, MDDTA, MTDTA and MHDTA

**Figure S1.** Increasing alkyl chain effect on % Yield and reaction time of SMMSs.

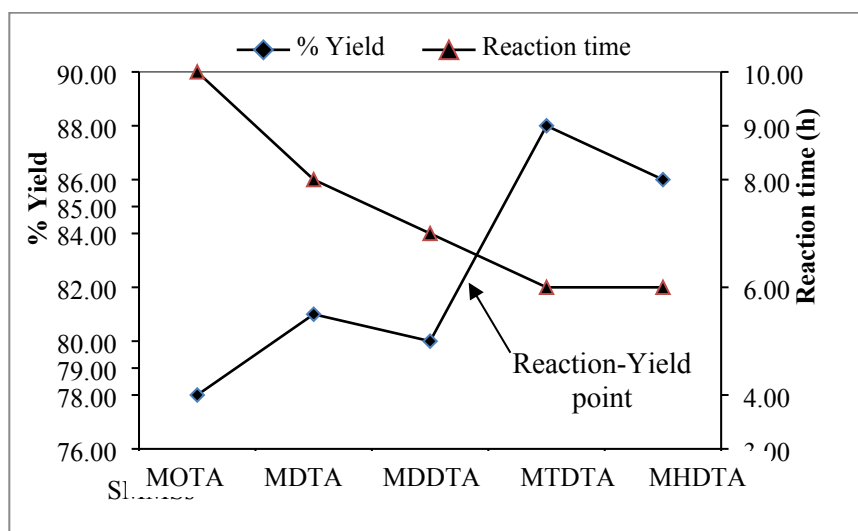

**Figure S2.**  $^1\text{H}$  proton NMR of OTAB in DMSO-d<sub>6</sub>.

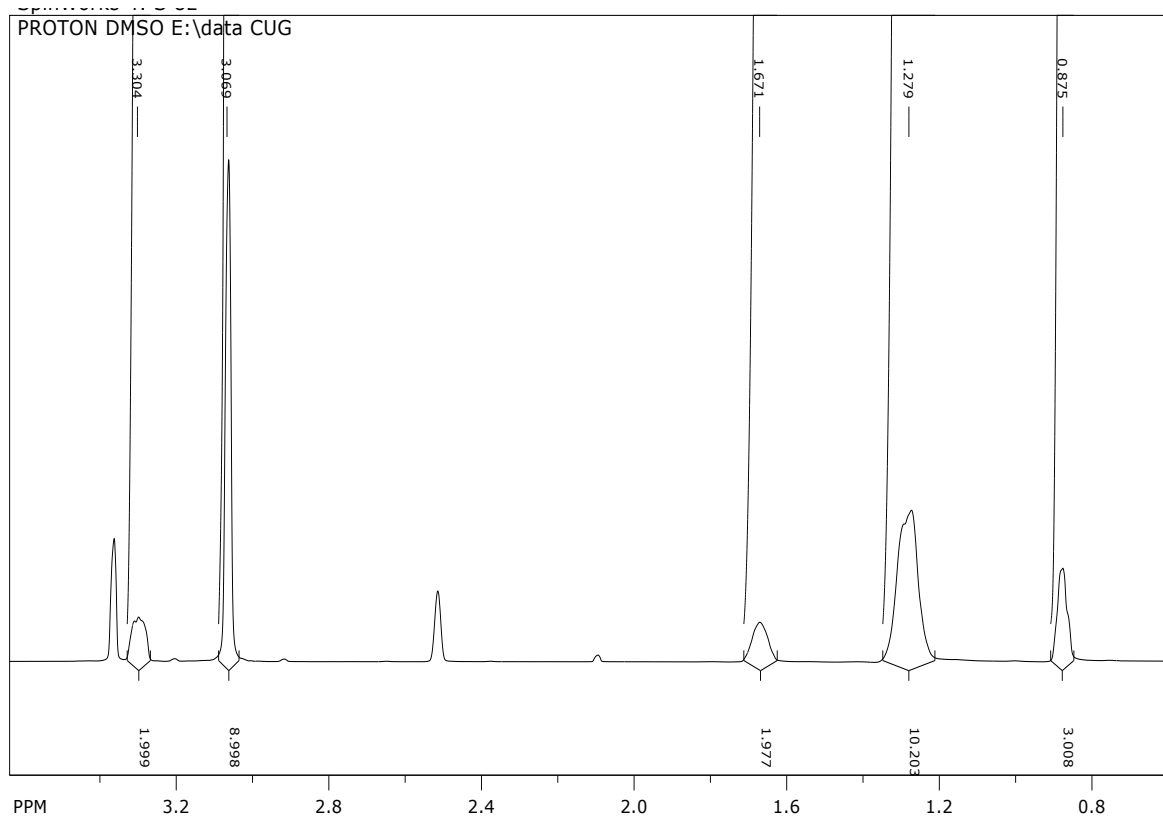

**Figure S3.**  $^1\text{H}$  proton NMR of MOTA in D<sub>2</sub>O.

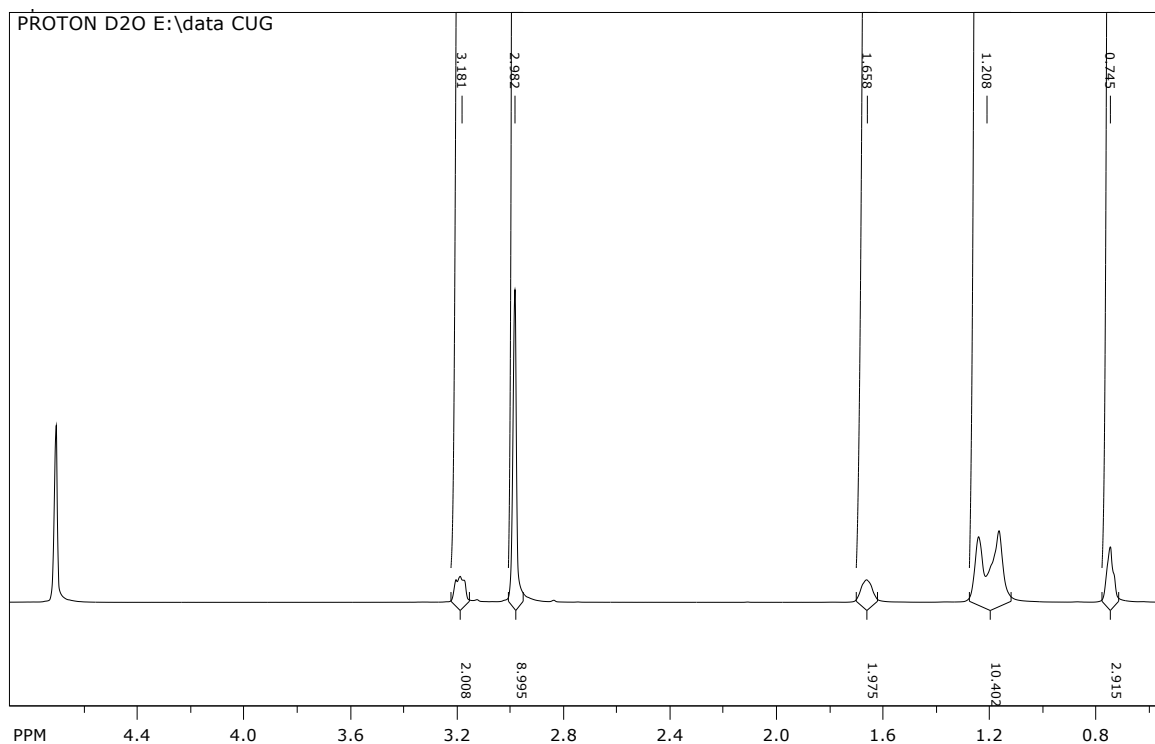

**Figure S4.**  $^1\text{H}$  proton NMR of DTAB in DMSO-d<sub>6</sub>.

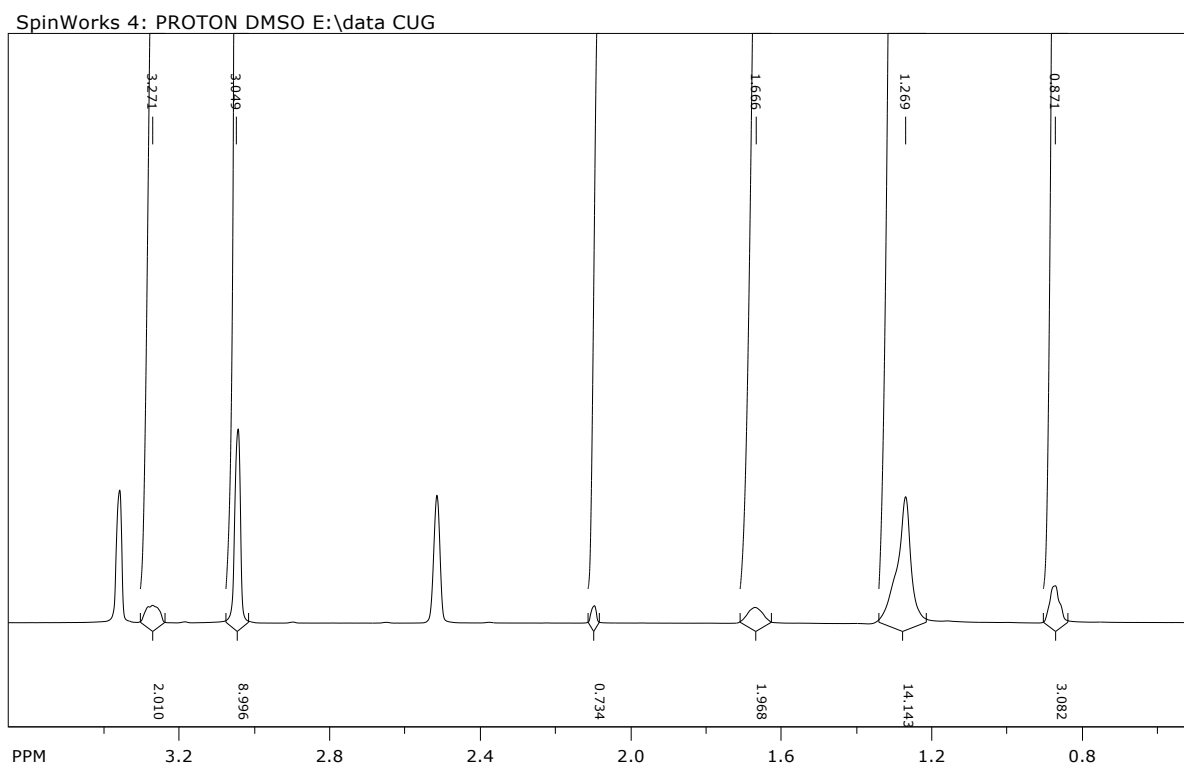

**Figure S5.**  $^1\text{H}$  proton NMR of MDTA in DMSO-d<sub>6</sub>.

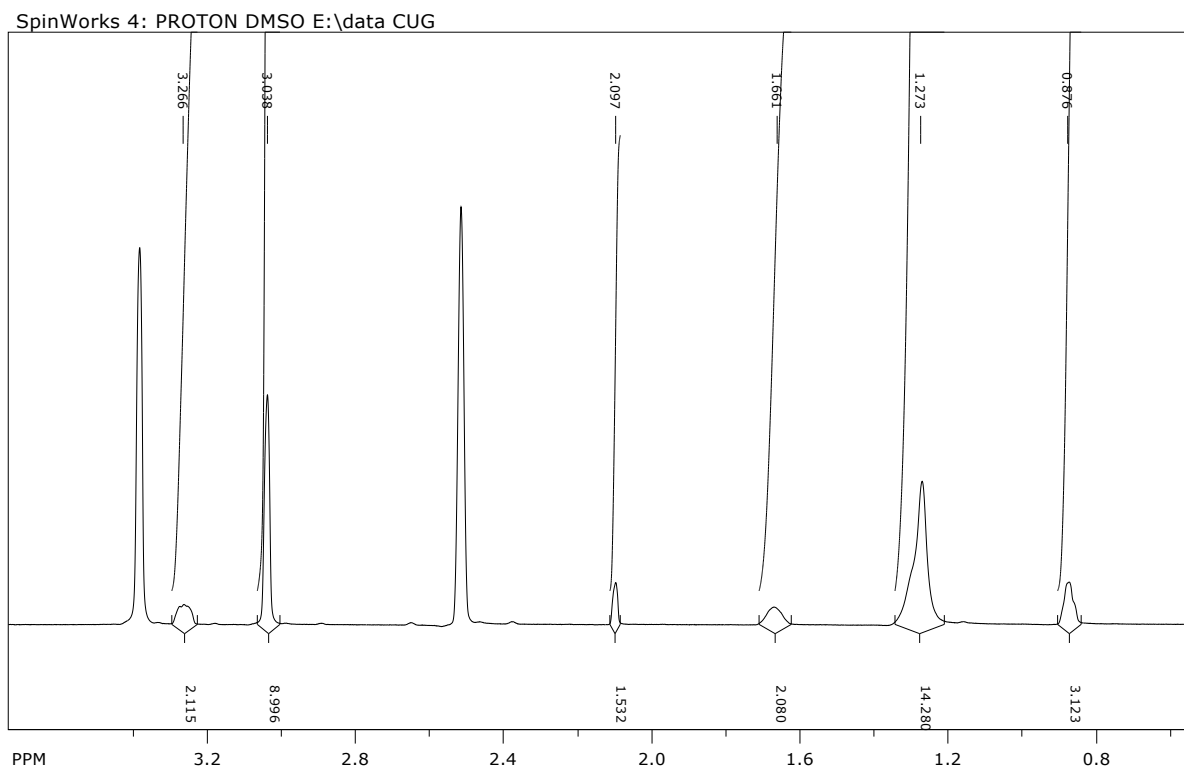

**Figure S6.**  $^1\text{H}$  proton NMR of DDTAB in DMSO-d<sub>6</sub>.

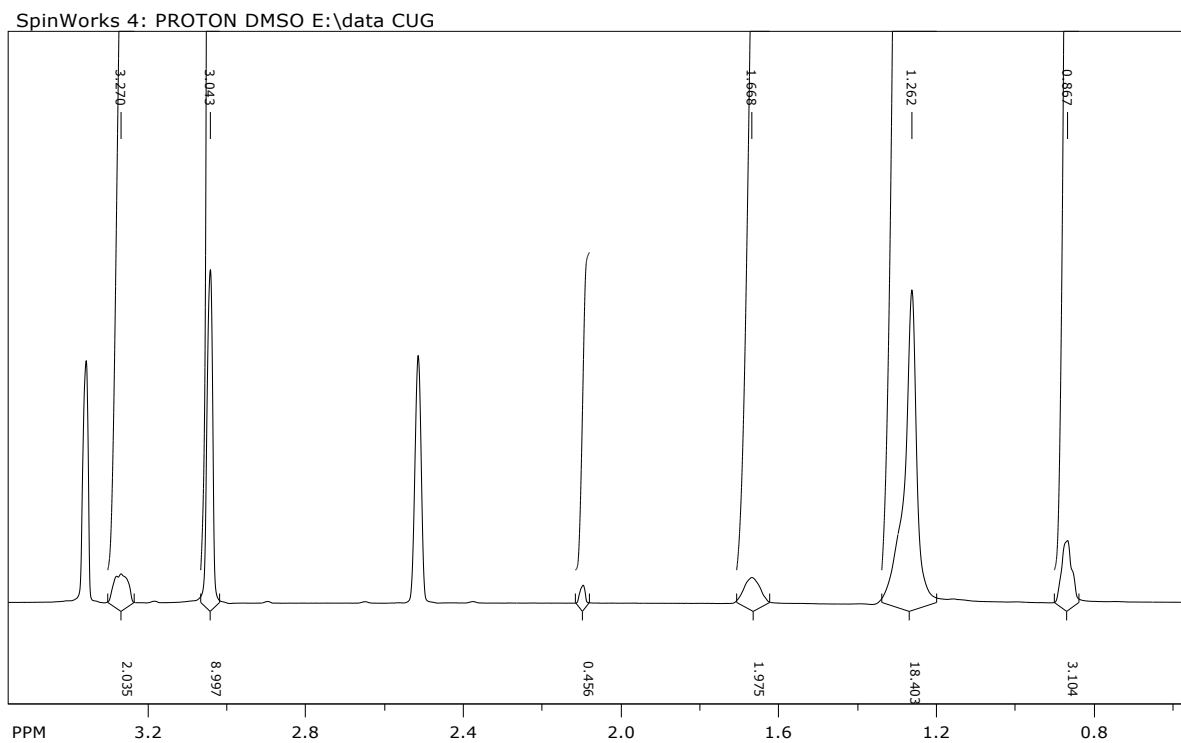

**Figure S7.**  $^1\text{H}$  proton NMR of MDDTA in DMSO-d<sub>6</sub>.

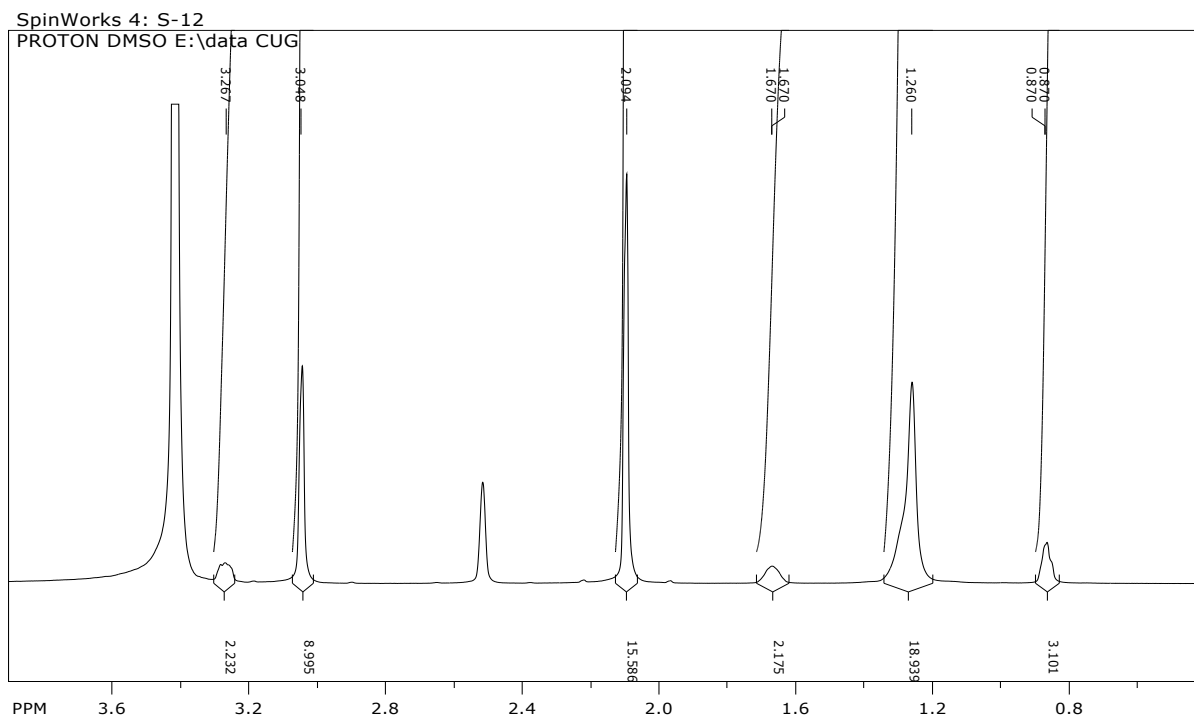

**Figure S8.**  $^1\text{H}$  proton NMR of TDTAB in DMSO-d<sub>6</sub>.

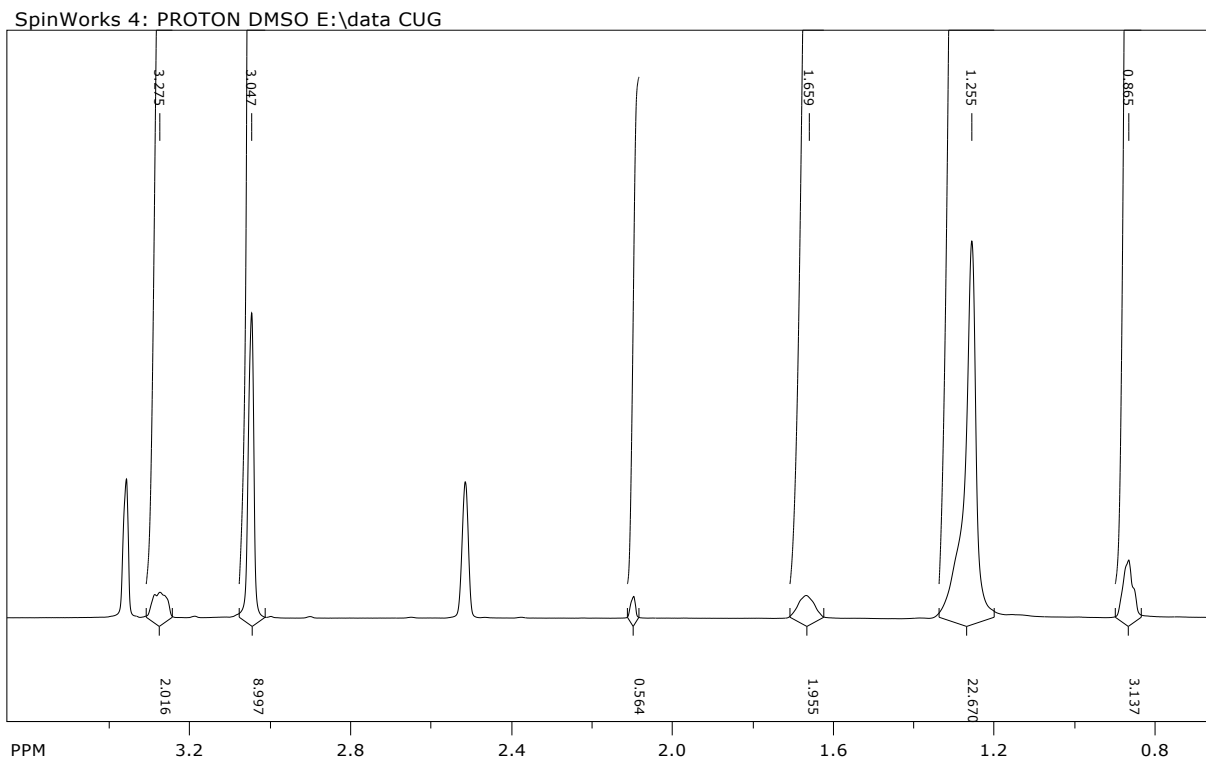

**Figure S9.**  $^1\text{H}$  proton NMR of MTDTA in DMSO-d<sub>6</sub>.

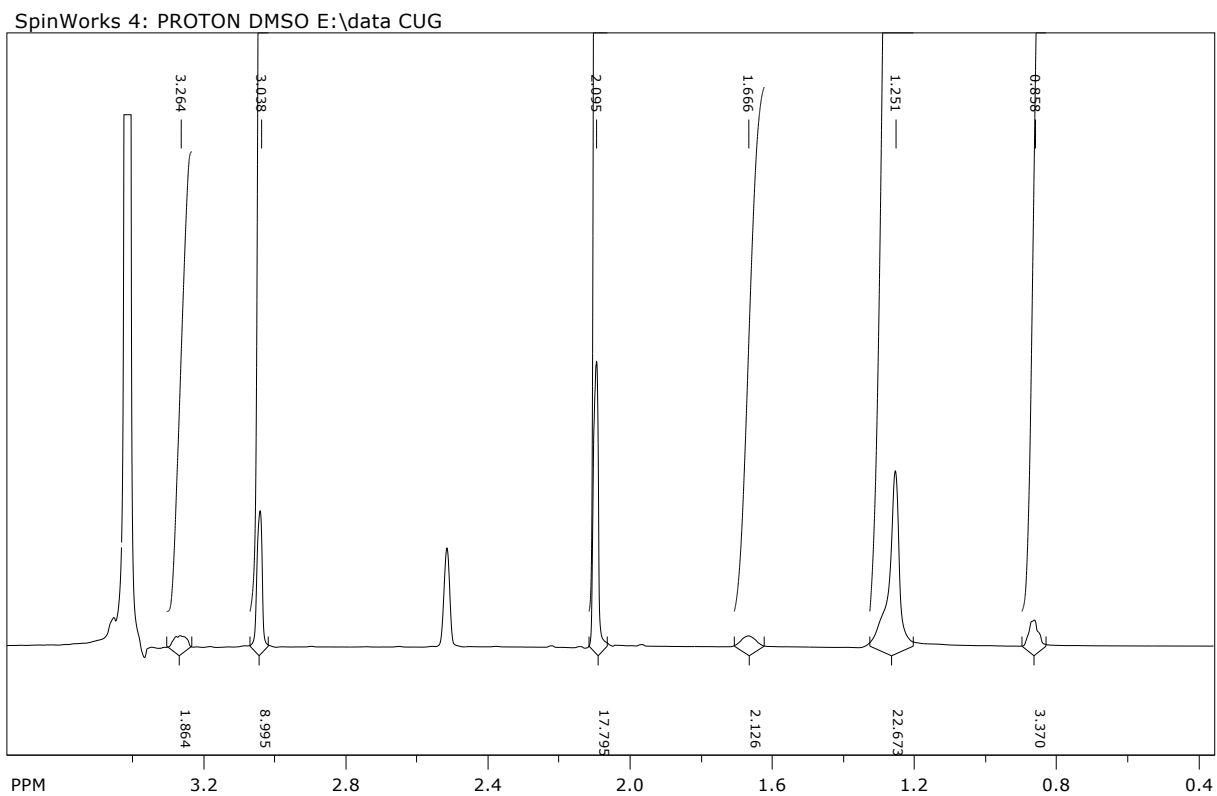

**Figure S10.**  $^1\text{H}$  proton NMR of HDTAB in DMSO-d<sub>6</sub>.

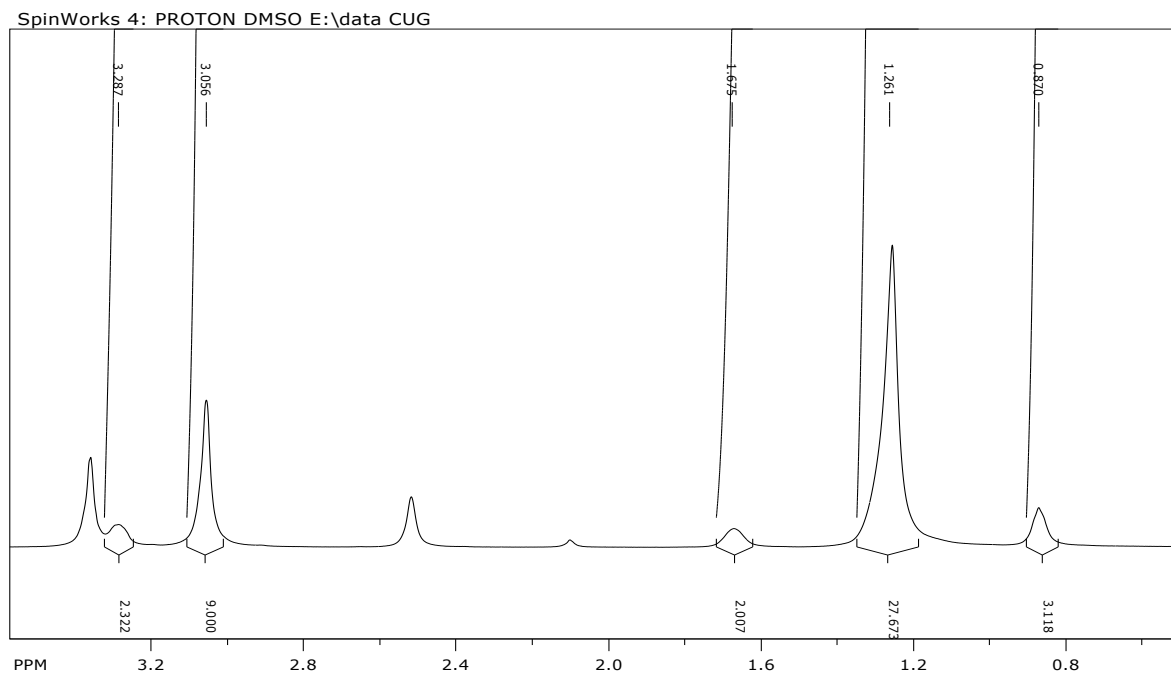

**Figure S11.**  $^1\text{H}$  proton NMR of MHDTA in DMSO-d<sub>6</sub>.

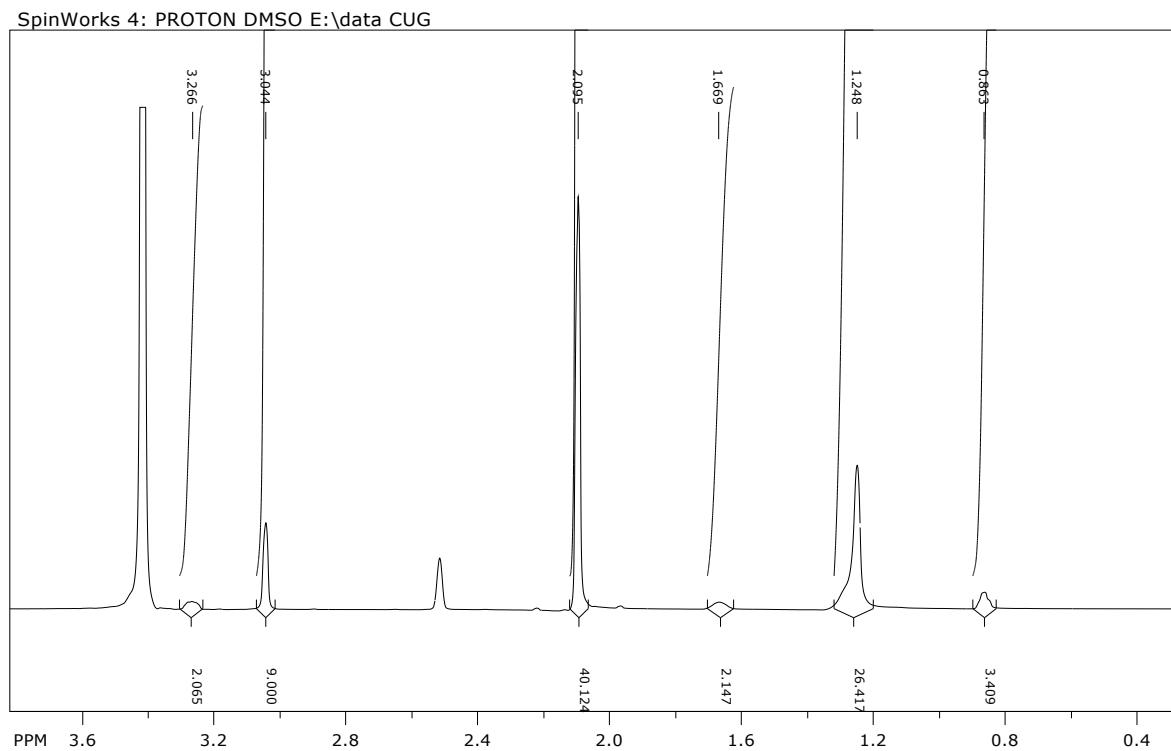



**Figure S12.** Variation of CMC of SMMSs in 0.2 volume fraction of DMSO in DMSO- water mixed solvent media at 308.15 K.

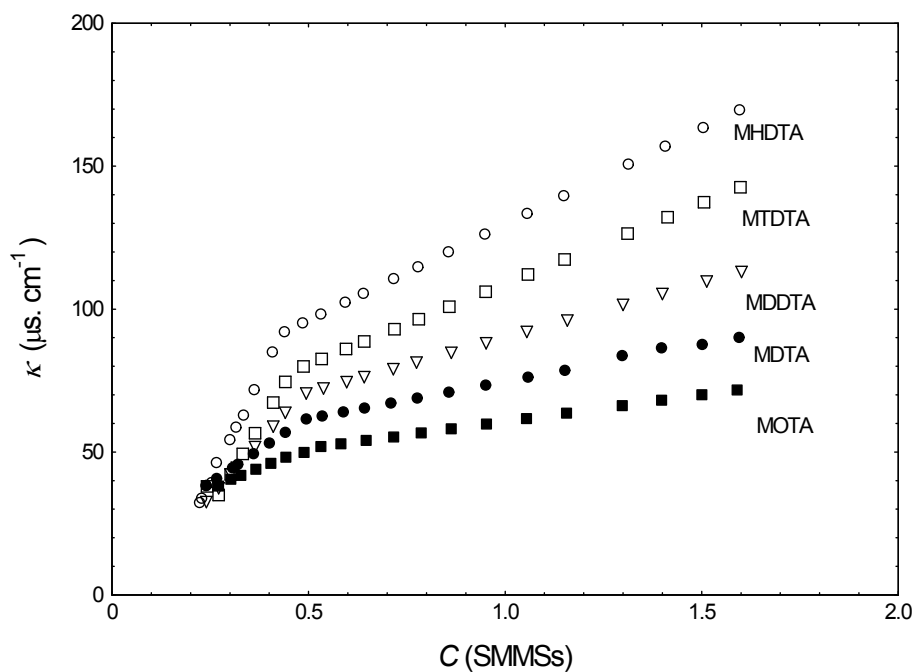

**Figure S13.** Variation of CMC of SMMSs in 0.2 volume fraction of DMSO in DMSO- water mixed solvent media at 318.15 K.

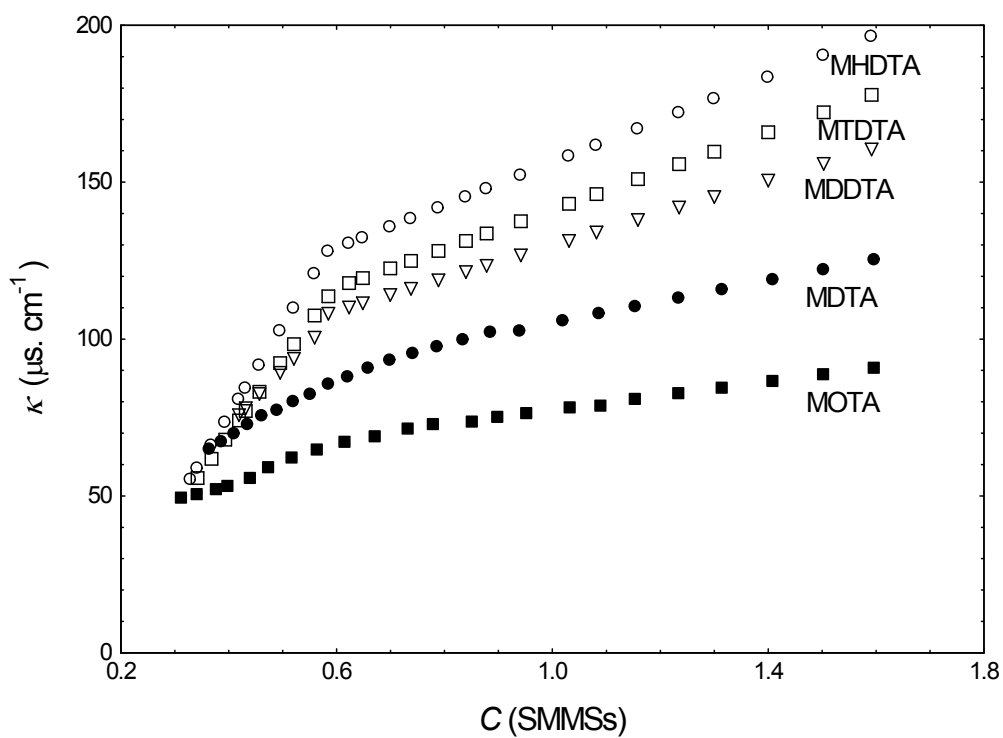

**Figure S14.** Linearization curves of SMMSs obtained by Coats–Redfern (CR) method.

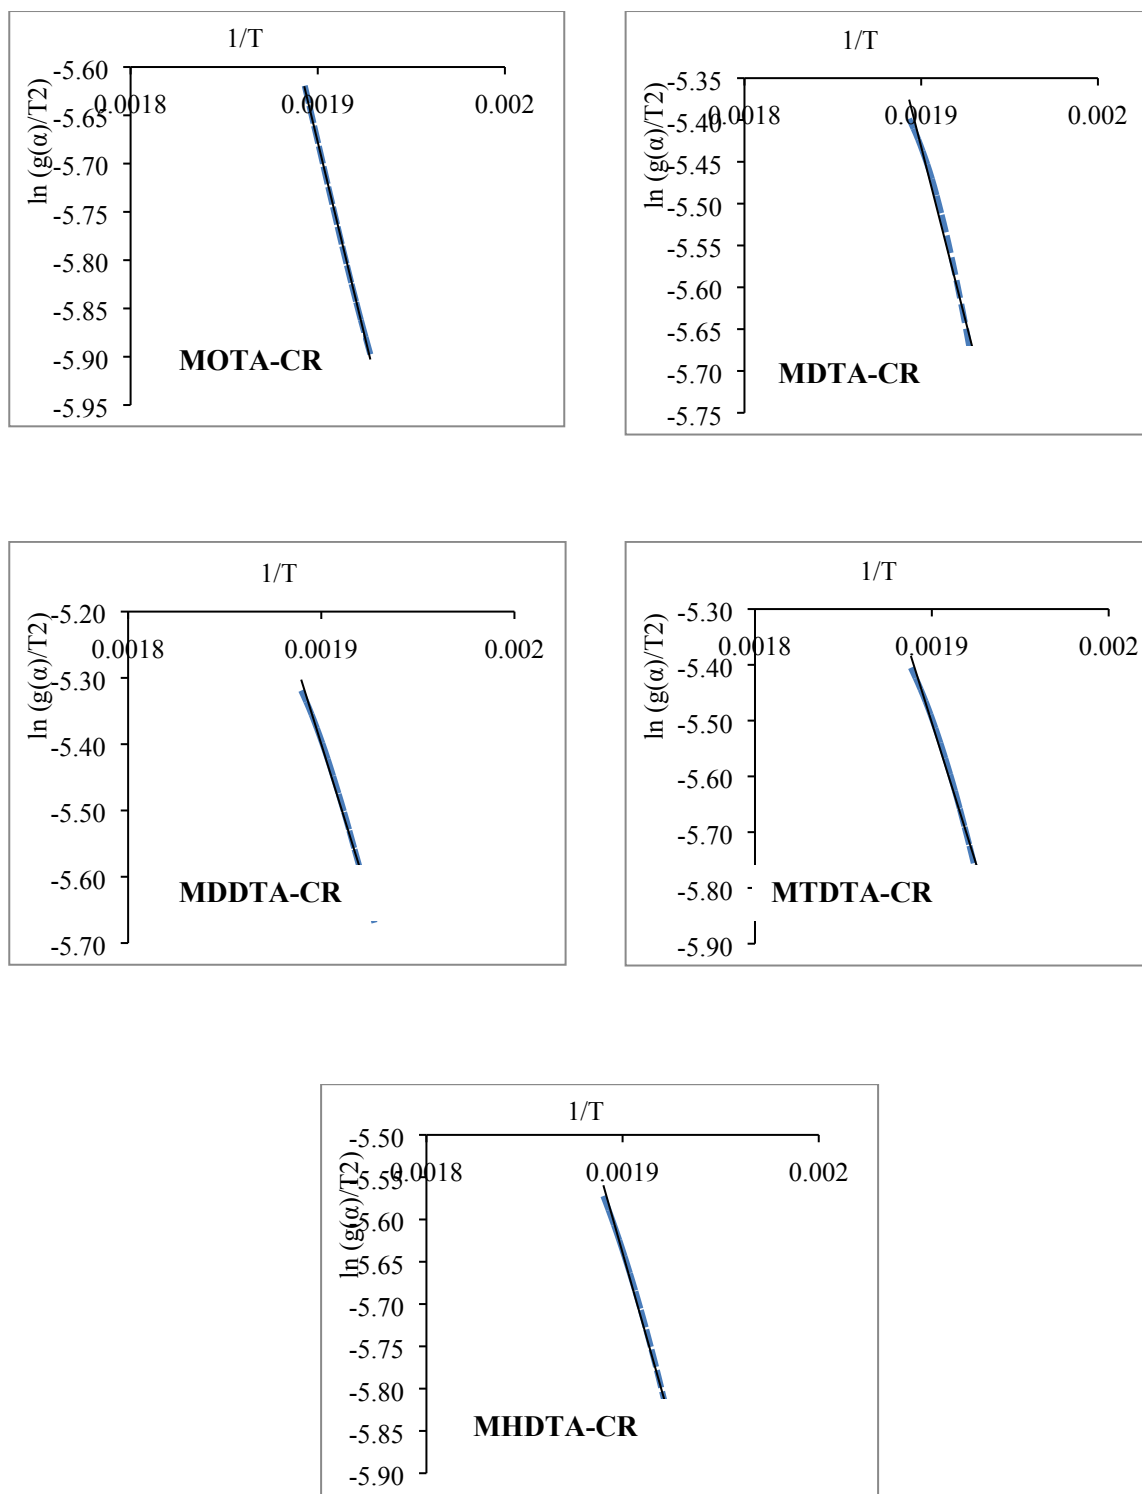

**Figure S15.** Linearization curves of SMMSs obtained by Madhusudanan–Krishnan–Ninan (MKN) method.

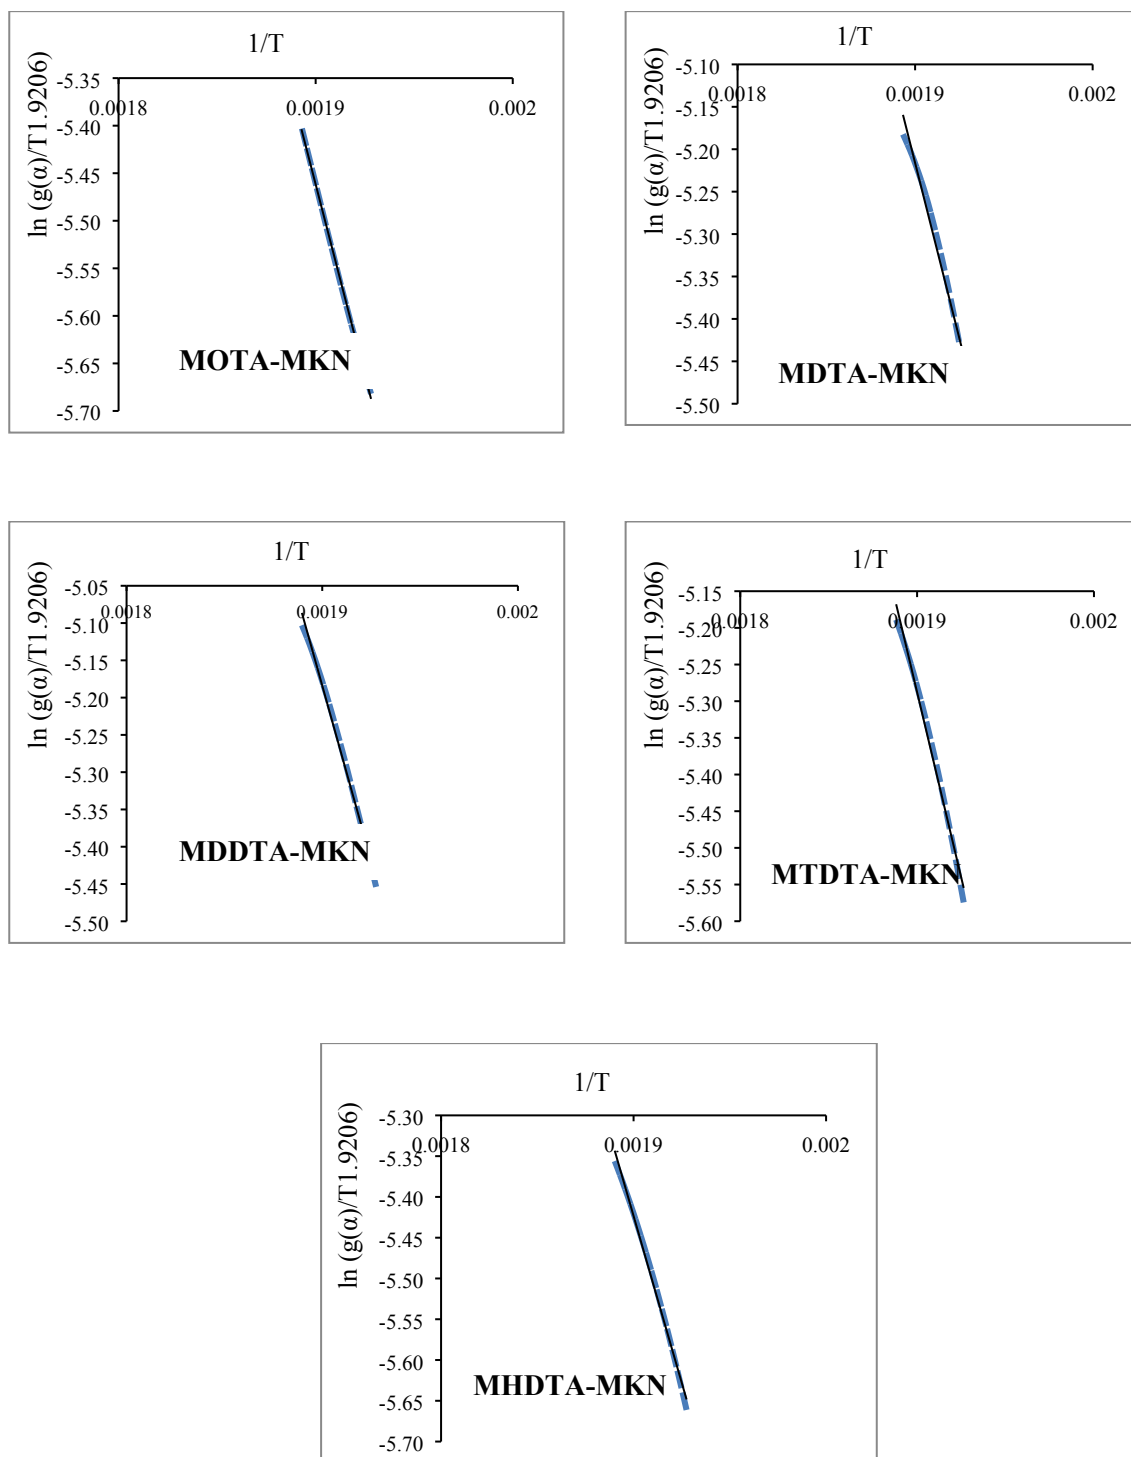

**Figure S16.** Linearization curves of SMMSSs obtained by Wanjun–Yuwen–Hen–Cunxin (WYHC) method.

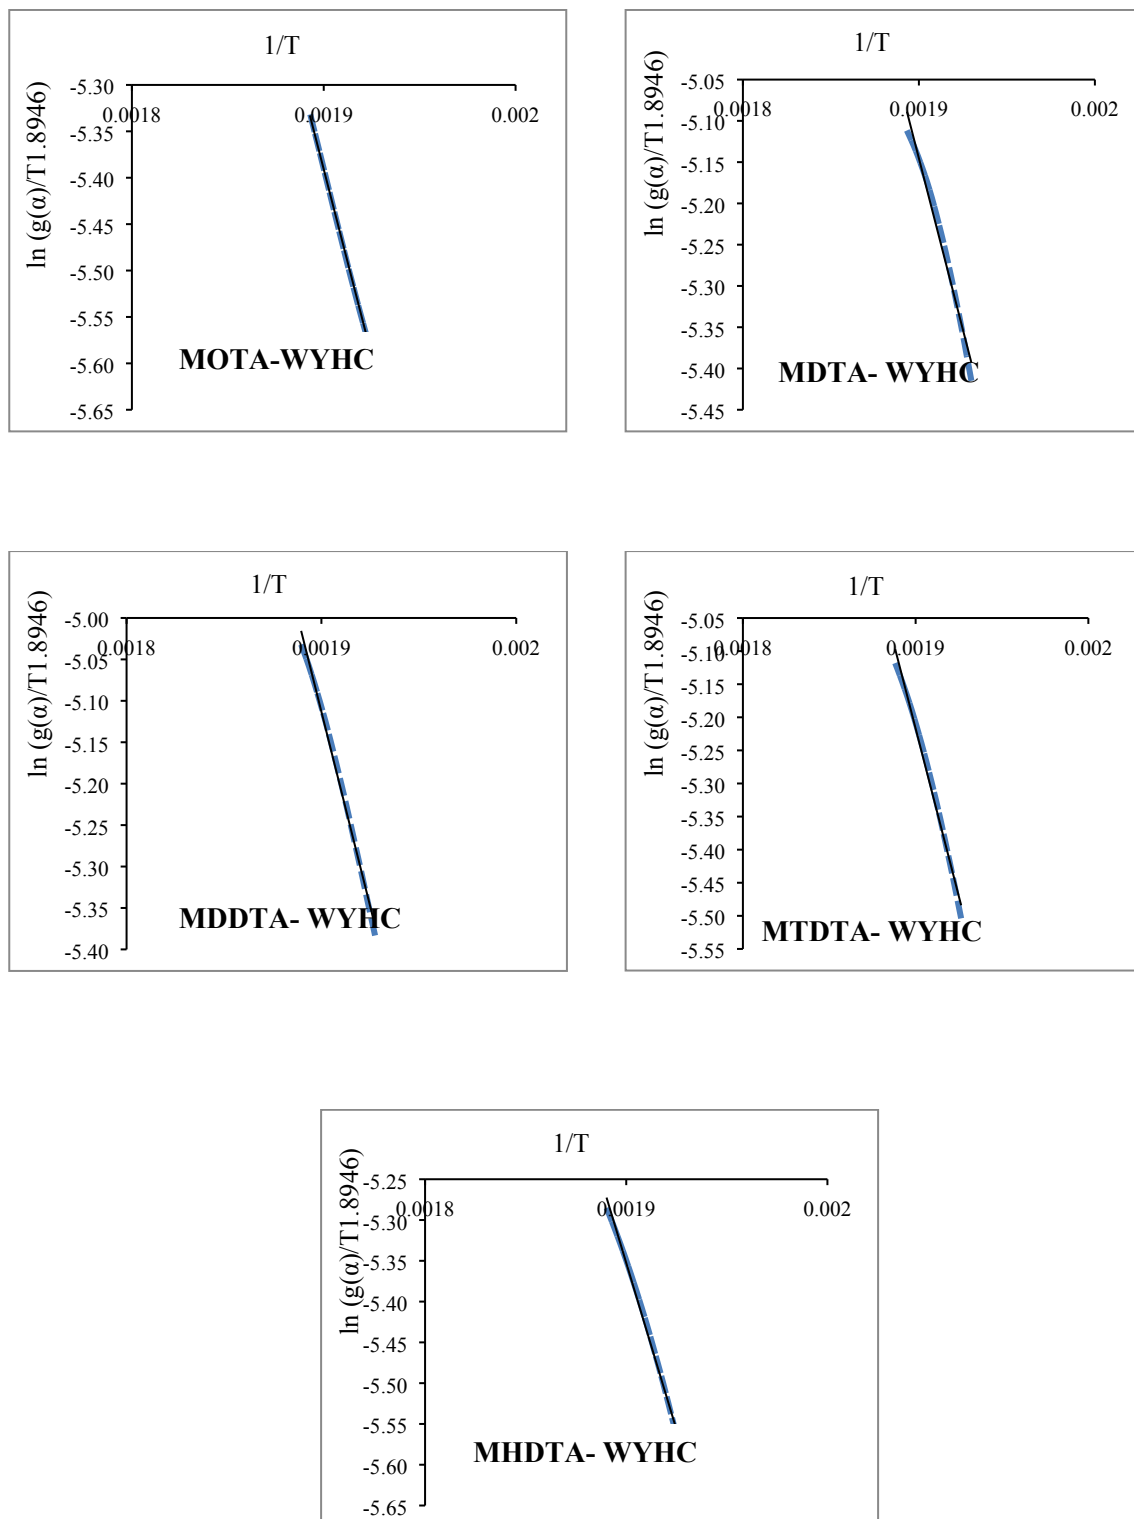

**Figure S17.** Linearization curves of SMMSs obtained by Van Krevelen (VK) method.

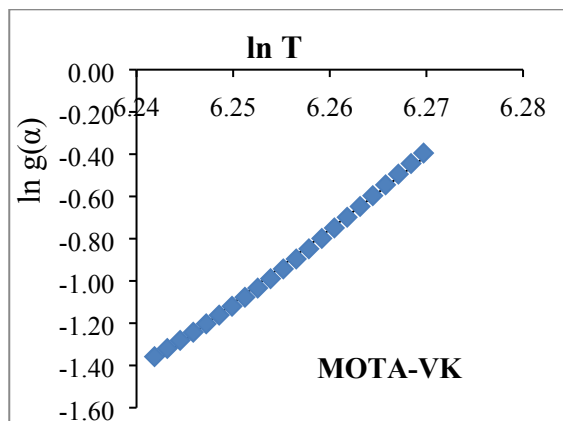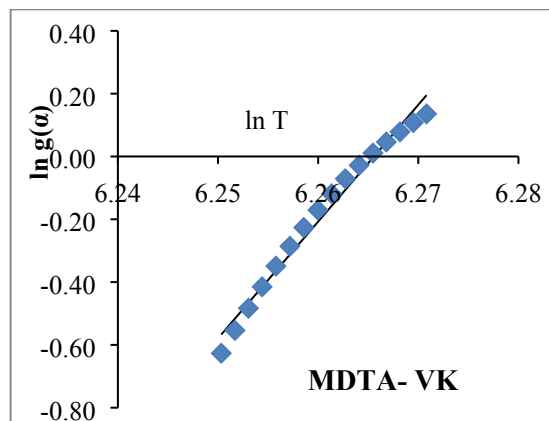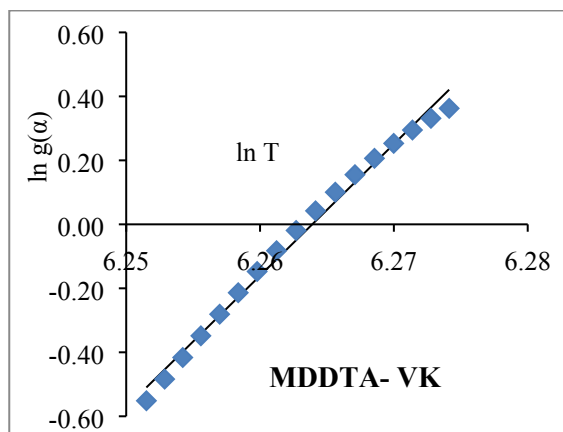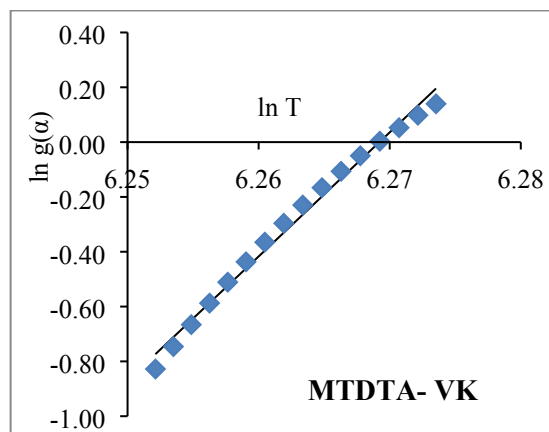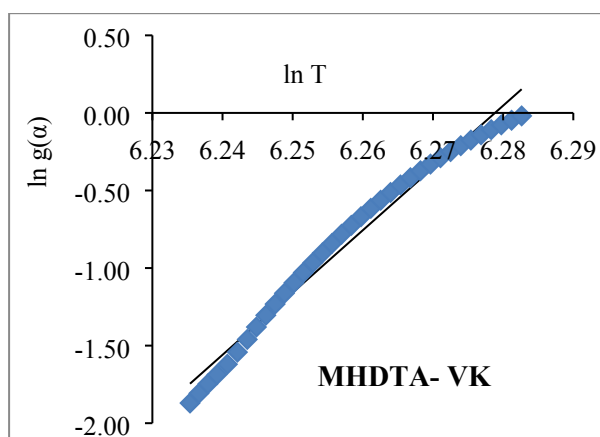

**Figure S18.** Linearization curves of SMMSs obtained by Horowitz–Metzger (HM) method.

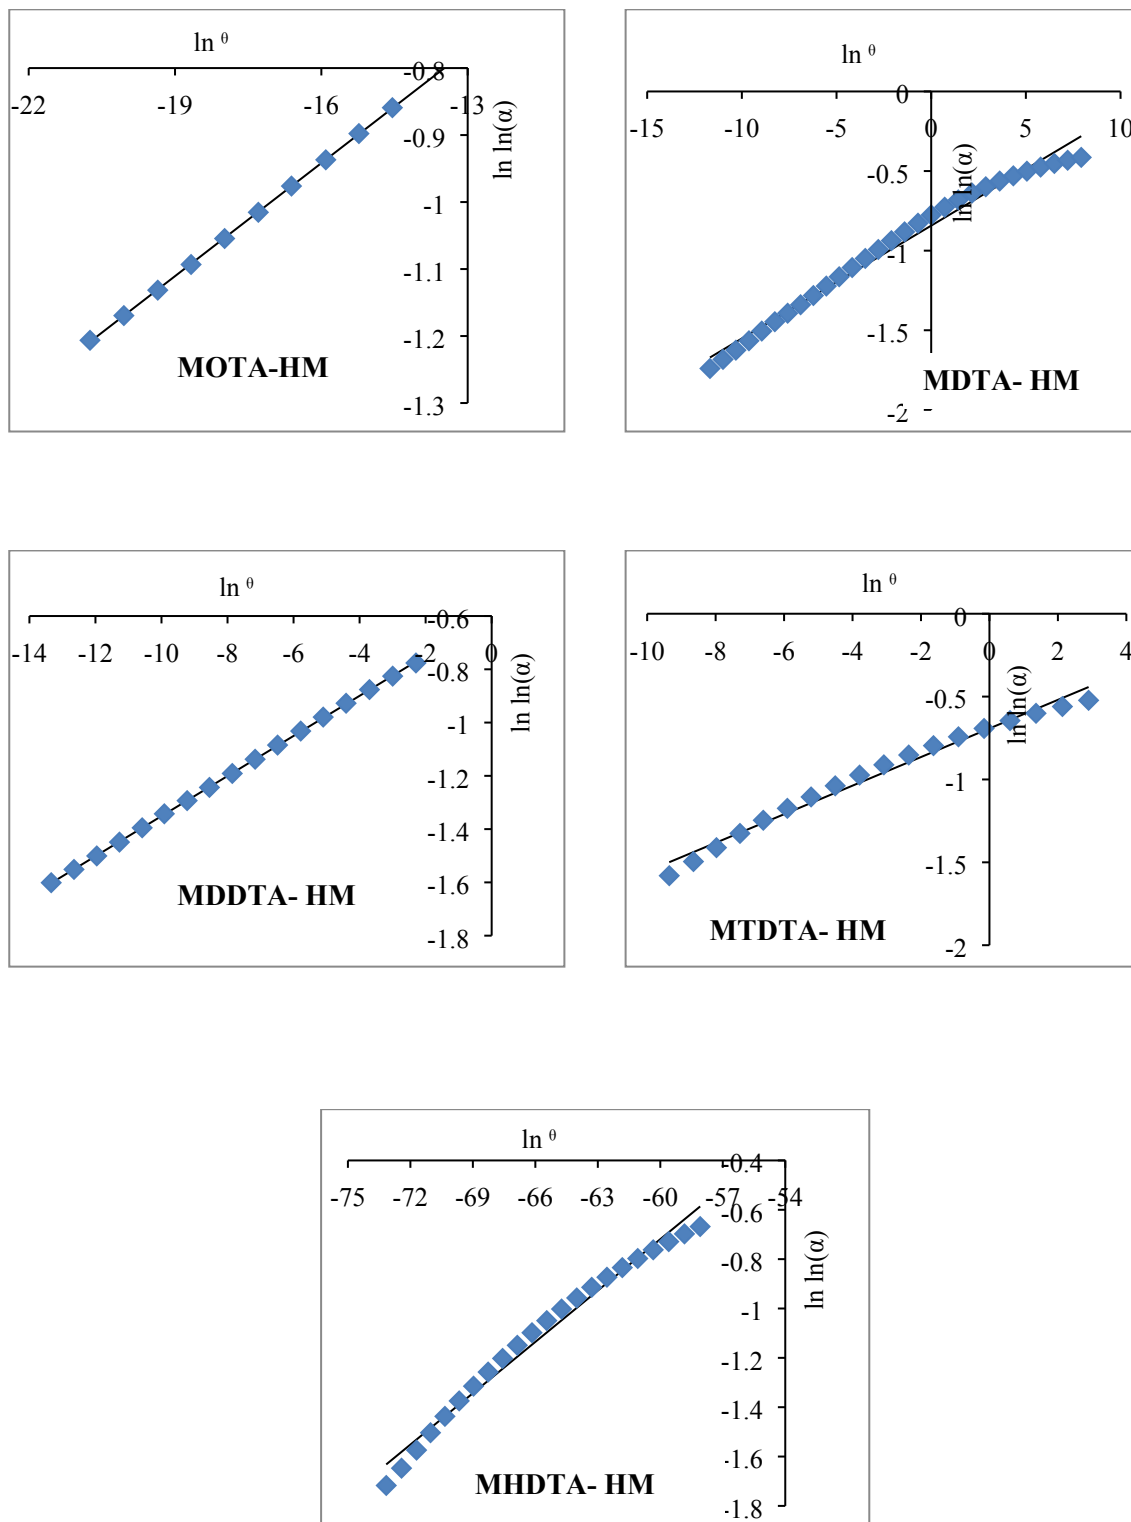

**Table S1.** Details of chemicals used in this work.

| S. No. | Product name                                | Country       | Provenance    | Mass fraction purity <sup>a</sup> | Purification method | Molecular weight (Kg/mole) | Molecular Formula                                                                                    |
|--------|---------------------------------------------|---------------|---------------|-----------------------------------|---------------------|----------------------------|------------------------------------------------------------------------------------------------------|
| 1      | Potassium tetrachloroplatinate (II)         | USA           | Sigma Aldrich | 0.99                              | None                | 0.41509                    | K <sub>2</sub> PtCl <sub>4</sub>                                                                     |
| 2      | Octyltrimethylammonium Bromide (OTAB)       | England       | Alfa Aser     | 0.97                              | None                | 0.25224                    | CH <sub>3</sub> (CH <sub>2</sub> ) <sub>6</sub> CH <sub>2</sub> N(CH <sub>3</sub> ) <sub>3</sub> Br  |
| 3      | Decyltrimethylammonium Bromide(DTAB)        | United states | Alfa Aser     | 0.98                              | None                | 0.2803                     | CH <sub>3</sub> (CH <sub>2</sub> ) <sub>10</sub> CH <sub>2</sub> N(CH <sub>3</sub> ) <sub>3</sub> Br |
| 4      | Dodecyltrimethylammonium Bromide(DDTAB)     | United states | Sigma Aldrich | 0.99                              | None                | 0.30834                    | CH <sub>3</sub> (CH <sub>2</sub> ) <sub>12</sub> CH <sub>2</sub> N(CH <sub>3</sub> ) <sub>3</sub> Br |
| 5      | Tetradecyltrimethylammonium bromide (TDTAB) | England       | Alfa Aser     | 0.98                              | None                | 0.3364                     | CH <sub>3</sub> (CH <sub>2</sub> ) <sub>14</sub> CH <sub>2</sub> N(CH <sub>3</sub> ) <sub>3</sub> Br |
| 6      | Hexadecyltrimethylammonium bromide (HDTAB)  | England       | Alfa Aser     | 0.98                              | None                | 0.36446                    | CH <sub>3</sub> (CH <sub>2</sub> ) <sub>16</sub> CH <sub>2</sub> N(CH <sub>3</sub> ) <sub>3</sub> Br |
| 7      | Dimethyl Sulfoxide (DMSO)                   | India         | Rankem Merck  | 99.8                              | None                | 0.07813                    | (CH <sub>3</sub> ) <sub>2</sub> SO                                                                   |
| 8      | Distilled water (18.2 MΩ.cm at 25°C)        | India         | MilliQ, USA   | Ultrapure                         | Ultrapurified       | 18.00                      | H <sub>2</sub> O                                                                                     |

<sup>a</sup>Mass fraction Purity as mentioned by supplier

**Table S2.** DLS data of MDTA, MDDTA, MTDTA and MHTDA

| SMMSs | Size (nm) | PDI   | % Passing and % Channel vs Particle size |
|-------|-----------|-------|------------------------------------------|
| MDTA  | 322       | 0.697 |                                          |
| MDDTA | 395       | 0.674 |                                          |

|       |      |       |                                                                                                                                                                                                                                                                                                                                                                                                                                                                                                                 |
|-------|------|-------|-----------------------------------------------------------------------------------------------------------------------------------------------------------------------------------------------------------------------------------------------------------------------------------------------------------------------------------------------------------------------------------------------------------------------------------------------------------------------------------------------------------------|
| MTDTA | 422  | 1.004 | 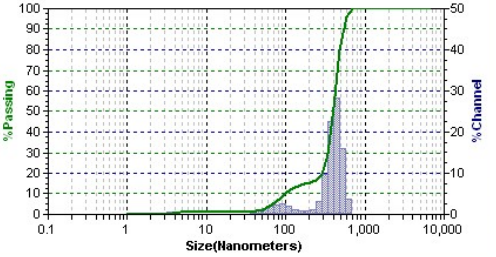 <p>The graph for MTDTA shows a particle size distribution with a sharp peak at approximately 500 nanometers. The x-axis represents Size (Nanometers) on a logarithmic scale from 0.1 to 10,000. The left y-axis represents % Passing from 0 to 100, and the right y-axis represents % Channel from 0 to 50. The distribution is narrow, with most particles falling between 100 and 1,000 nanometers.</p>                    |
| MHDTA | 38.7 | 1.268 |  <p>The graph for MHDTA shows a particle size distribution with a broad peak centered around 10-20 nanometers. The x-axis represents Size (Nanometers) on a logarithmic scale from 0.1 to 10,000. The left y-axis represents % Passing from 0 to 100, and the right y-axis represents % Channel from 0 to 20. The distribution is much wider than MTDTA, with particles ranging from approximately 1 to 1,000 nanometers.</p> |
